# Supplementary material for: Multiple guest occupancy in clathrate hydrates and its significance in hydrogen storage
Source: Royal Society of Chemistry journal article supplement (doi:10.1039/c3cc43376e), 2013-01-01
Supplement: c3cc43376e.pdf [file c3cc43376e.pdf]

**Supplementary materials for**  
**Multiple Guest Occupancy in Clathrate Hydrates and Its**  
**Significance to Hydrogen Storage**

Dong-Yeun Koh,<sup>a</sup> Hyery Kang<sup>a</sup> and Huen Lee<sup>\*a,b</sup>

<sup>a</sup>Department of Chemical and Biomolecular Engineering, KAIST, Daejeon 305-701, Republic of Korea

<sup>b</sup>Graduate School of EEWS, KAIST, Daejeon 305-701, Republic of Korea

\*To whom correspondence should be addressed. E-mail : hlee@kaist.ac.kr

**Table of Contents**

**S1. Experimental Methods**

**Figure S1** Raman spectra according to the molar ratio of 1-methylpiperidine, where single and multiple hydrogen occupancy instances are shown

**Figure S2** Time-resolved Raman spectra of the 0.5 mol% 1-methylpiperidine product. Within 24 hours, a full tuning effect is observed.

## **S1. Experimental Method**

### Synthesis of clathrate hydrate samples

Deionized water of ultrahigh purity was supplied from Merck (Germany) and the 1-methylpiperidine, 2-methylpiperidine, 3-methylpiperidine and 4-methylpiperidine samples were supplied by Sigma-Aldrich Inc. H<sub>2</sub> gas with a purity of 99.9995mol% was supplied by Special Gas (Korea). Powdered ice (~200 $\mu$ m) was mixed with an appropriate amount of solid MPDs in liquid nitrogen (LN<sub>2</sub>). These solid-solid mixtures were pressurized with H<sub>2</sub> up to 12 MPa at 77K. The reactors were then placed in a temperature-controlled bath at 240K. The pressure of each system became stable at around 58 MPa after 6-24hr. Under this temperature and pressure condition, pure hydrogen hydrate could not be formed without a promoter. The reactor was kept in a 240K bath for 3 days. Reactor was quenched in LN<sub>2</sub> and simultaneously the pressure was released to atmospheric pressure for further spectroscopic analysis.

### Characterization methods: PXRD, Raman Spectroscopy

For Raman measurements the Horiba Jobin Yvon LabRAM HR UV/Vis/NIR high resolution dispersive Raman microscope was used in which a CCD detector is equipped and cooled by liquid nitrogen. The excitation source was an Ar-ion laser emitting a 514.53 nm line. The laser intensity was typically 30 mW. Samples were kept at 77 K during Raman measurements. For variable temperature experiment, LINKAM unit was used to control the sample temperature.

The PXRD patterns were obtained using Rigaku D/max-IIIc diffractometer with CuK $\alpha$  as a light source ( $\lambda=1.5406$  Å) at a generator voltage of 40 kV and a generator current of 300 mA. Low-temperature stage attached to XRD kept the working temperature to 90K and step scan mode of 0.01°/3s was applied.

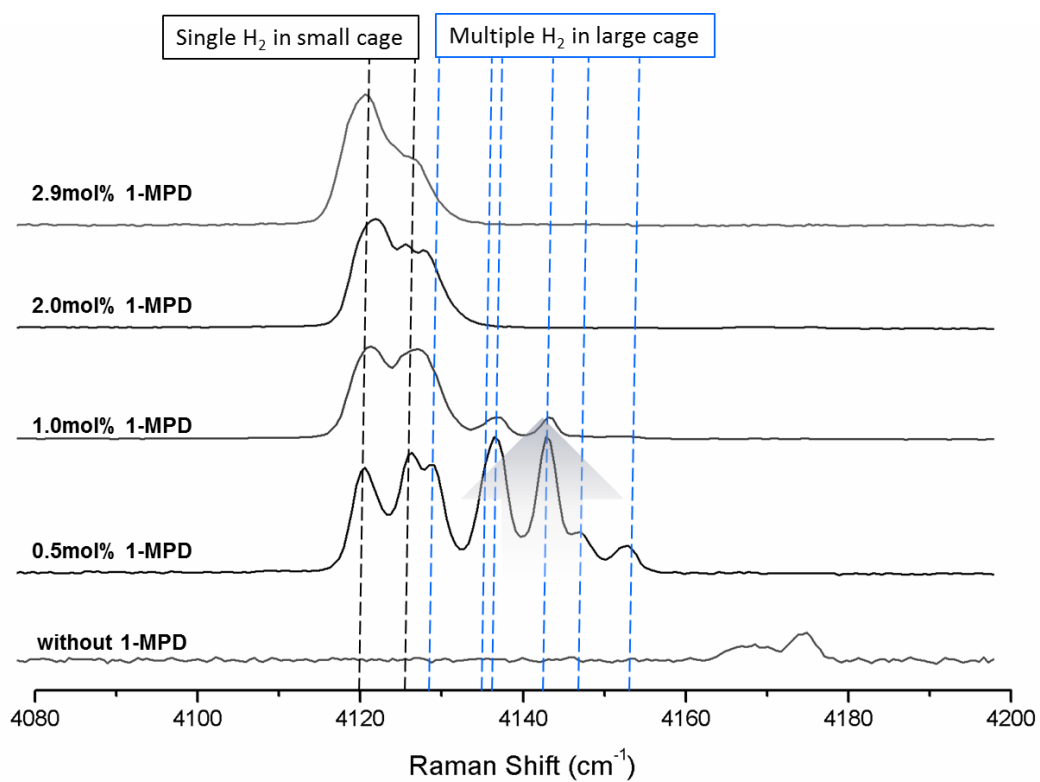

**Figure S1.** Raman spectra according to the molar ratio of 1-methylpiperidine, where single and multiple hydrogen occupancy instances are shown

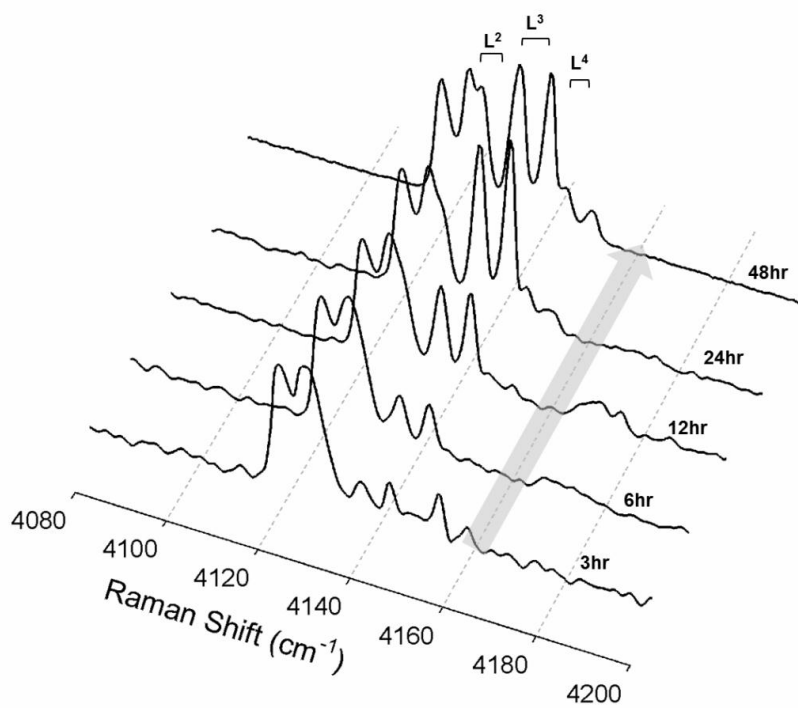

**Figure S2.** Time-resolved Raman spectra of the 0.5 mol% 1-methylpiperidine product.

Within 24 hours, a full tuning effect is observed.
